# Supplementary material for: Adjusting MtDNA Quantification in Whole Blood for Peripheral Blood Platelet and Leukocyte Counts
Source: PubMed Central journal article supplement (PMC5063275; doi:10.1371/journal.pone.0163770), 2016-10-13
Supplement: pone.0163770.s001.pdf [file pone.0163770.s001.pdf]

## SUPPLEMENTAL DATA (S1 File)

**Table A: qPCR primers sequences**

| Gene                    | Strand     | Position      | Length (bp) | Sequence                      | Amplicon length (bp) |
|-------------------------|------------|---------------|-------------|-------------------------------|----------------------|
| SDHA<br>(NC_000005.10)  | Plus/Plus  | 223475-223495 | 21          | 5'-TCTCCAGTGGCCAACAGTGTT-3'   | 72                   |
|                         | Plus/Minus | 223546-223527 | 20          | 5'-GCCCTCTTGTTCCCATCAAC-3'    |                      |
| MT-CO2<br>(NC_012920.1) | Plus/Plus  | 7858-7877     | 20          | 5'-CGATCCCTCCCTTACCATCA-3'    | 69                   |
|                         | Plus/Minus | 7926-7904     | 23          | 5'-CCGTAGTCGGTGTACTCGTAGGT-3' |                      |
|                         | Plus/Minus | 8081-8062     | 20          | 5'-GGACAGCTCATGAGTGCAAG-3'    |                      |

**Table B: Multilevel mixed-effect models for mtDNAcn(WB) measured in blood preparations (n=46)**

|                                                                           | <b>MODEL 1</b>    | <b>MODEL 2</b>    | <b>MODEL 3</b>    |
|---------------------------------------------------------------------------|-------------------|-------------------|-------------------|
| <b>Generalized Akaike information criterion (AIC)</b>                     | 528.10            | 523.32            | 522.49            |
| <b>Change in mtDNAcn(WB) per unit change in Platelet/Leukocytes ratio</b> | 1.10 (0.97, 1.22) | 1.07 (0.91, 1.23) | 1.07 (0.89, 1.25) |

MODEL 1: Common slope and random intercept (per sample)

MODEL 2: Correlated random intercept and slope (per sample)

MODEL 3: Uncorrelated random intercept and slope (per sample)

mtDNAcn: mitochondrial DNA copy number, WB: whole blood

**Table C: Reclassification of AWHs cohort study subjects (n=3389) between mtDNAcn(WB) quintiles and mtDNAcn(L) quintiles**

| Quintiles<br>mtDNAcn(WB) | Quintiles mtDNAcn(L)   |                      |                      |                      |                          |
|--------------------------|------------------------|----------------------|----------------------|----------------------|--------------------------|
|                          | [lowest,17.6]<br>n=678 | (17.6,27.2]<br>n=678 | (27.2,35.2]<br>n=677 | (35.2,45.4]<br>n=678 | (45.4, highest]<br>n=678 |
| [lowest,55.6]<br>n=678   | 375                    | 221                  | 72                   | 10                   | 0                        |
| (55.6,62.9]<br>n=678     | 175                    | 220                  | 189                  | 93                   | 1                        |
| (62.9,70.3]<br>n=677     | 89                     | 130                  | 230                  | 188                  | 40                       |
| (70.3,79.7]<br>n=678     | 31                     | 80                   | 140                  | 258                  | 169                      |
| (79.7, highest]<br>n=678 | 8                      | 27                   | 46                   | 129                  | 468                      |
